# Supplementary material for: Artificial Intelligence in Predicting Microsatellite Instability and KRAS, BRAF Mutations from Whole-Slide Images in Colorectal Cancer: A Systematic Review
Source: Diagnostics (Basel). 2023 Dec 31;14(1):99. doi: 10.3390/diagnostics14010099 (PMC10795725; doi:10.3390/diagnostics14010099)
Supplement: Supplementary file 1 [file diagnostics-14-00099-s001.zip]

Archive with 6 entries (6 files):
- flow chart FIGURE.jpg
- PROBAST overall (final )TABLE S4 final.xlsx
- QUADAS2  questions  Table S3 final.xlsx
- QUADAS2 applicability Table S2 final.xlsx
- TABLE S1 PRISMA_2020_checklist.pdf
- Tableau Stage_biomarkers_ttt FIGURE S1.pptx
