# Supplementary material for: Artificial Intelligence in Predicting Microsatellite Instability and KRAS, BRAF Mutations from Whole-Slide Images in Colorectal Cancer: A Systematic Review
Source: Diagnostics (Basel). 2023 Dec 31;14(1):99. doi: 10.3390/diagnostics14010099 (PMC10795725; doi:10.3390/diagnostics14010099)
Supplement: Supplementary file 1 [file diagnostics-14-00099-s001.zip › PROBAST overall (final )TABLE S4 final.xlsx]

## Sheet: Feuil1
PROBAST (Risk of bias and Applicability of prediction model studies)		Zhang et al. (2018)	Schmauch et al (2019)	Echle et al (2020)	Yamashita et al.(2021)	Lee et al. (2021)	Kather et al. (2020	Krause et al. (2021)	Cao et al. (2020)	Echle et al. (2022)	Wu Jiang et al.(2022)	Bilal et al.(2021)		Jang HJ et al.(2020)	Schrammen et al.(2021)		Saillard et al. (2022)	Chang et al. (2023)	Schirris et al. ( 2022)	Lou et al, (2022)
		MSI	MSI	MSI	MSI	MSI	MSI	MSI	MSI	MSI	MSI	MSI	KRAS/BRAF	KRAS	MSI	KRAS/BRAF	MSI	MSI	MSI	MSI
Overall	Risk of Bias
	Applicability
low risk of bias or low concern regarding applicability
high risk of bias or high concern regarding applicability
Not applicable	NA
PROBAST (Risk of bias and Applicability of Prediction Model Studies)
		Zhang et al. (2018)	Schmauch et al (2019)	Echle et al (2020)	Yamashita et al.(2021)	Lee et al. (2021)	Kather et al. (2020	Krause et al. (2021)	Cao et al. (2020)	Echle et al. (2022)	Wu Jiang et al.(2022)	Bilal et al.(2021)		Jang HJ et al.(2020)	Schrammen et al.(2021)		Saillard et al. (2022)	Chang et al. (2023)	Schirris et al. ( 2022)	Lou et al, (2022)
		MSI	MSI	MSI	MSI	MSI	MSI	MSI	MSI	MSI	MSI	MSI	KRAS/BRAF	KRAS	MSI	KRAS/BRAF	MSI	MSI	MSI	MSI
DOMAIN 1: Participants
1.1 Were appropriate data sources used, e.g. cohort, RCT or nested case-control study data?
1.2 Were all inclusions and exclusions of participants appropriate?
DOMAIN 2: Predictors
2.1 Were predictors defined and assessed in a similar way for all participants?
2.2 Were predictor assessments made without knowledge of outcome data?
2.3 Are all predictors available at the time the model is intended to be used?
DOMAIN 3: Outcome
3.1 Was the outcome determined appropriately?
3.2 Was a pre-specified or standard outcome definition used?
3.3 Were predictors excluded from the outcome definition?
3.4 Was the outcome defined and determined in a similar way for all participants?
3.5 Was the outcome determined without knowledge of predictor information?
3.6 Was the time interval between predictor assessment and outcome determination appropriate?
DOMAIN 4: Analysis
4.1 Were there a reasonable number of participants with the outcome?
4.2 Were continuous and categorical predictors handled appropriately?
4.3 Were all enrolled participants included in the analysis?
4.4 Were participants with missing data handled appropriately?
4.5 Was selection of predictors based on univariable analysis avoided?
4.6 Were complexities in the data (e.g. censoring, competing risks, sampling of controls)accounted for appropriately?
4.7 Were relevant model performance measures evaluated appropriately?
4.8 Were model overfitting and optimism in model performance accounted for?
4.9 Do predictors and their assigned weights in the final model correspond to the results from multivariable analysis?
yes ( absence of bias
no ( potential bias )
no information
