# Supplementary material for: Artificial Intelligence in Predicting Microsatellite Instability and KRAS, BRAF Mutations from Whole-Slide Images in Colorectal Cancer: A Systematic Review
Source: Diagnostics (Basel). 2023 Dec 31;14(1):99. doi: 10.3390/diagnostics14010099 (PMC10795725; doi:10.3390/diagnostics14010099)
Supplement: Supplementary file 1 [file diagnostics-14-00099-s001.zip › QUADAS2 applicability Table S2 final.xlsx]

## Sheet: Feuil1
Authors (Year) [Reference]		Risk of bias
	Mutation Pathway	Patient Selection	Index Test	Reference Standard	Flow and Timing
Zhang et al. (2018)	MSI
Schmauch et al (2019)	MSI
Echle et al (2020)	MSI
Yamashita et al.(2021)	MSI
Lee et al. (2021)	MSI
Kather et al. (2020	MSI
Krause et al. (2021)	MSI
Cao et al. (2020)	MSI
Echle et al. (2022)	MSI
Wu Jiang et al.(2022)	MSI
Bilal et al.(2021)	MSI
	KRAS/BRAF
Jang HJ et al.(2020)	KRAS
Schrammen et al.(2021)	MSI
	KRAS/BRAF
Saillard et al. (2022)	MSI
Chang et al. (2023)	MSI
Schirris et al. ( 2022)	MSI
Lou et al, (2022)	MSI
Low Risk
High Risk
Uncertain Risk
Not applicable	NA		NA
