# Supplementary material for: Artificial Intelligence in Predicting Microsatellite Instability and KRAS, BRAF Mutations from Whole-Slide Images in Colorectal Cancer: A Systematic Review
Source: Diagnostics (Basel). 2023 Dec 31;14(1):99. doi: 10.3390/diagnostics14010099 (PMC10795725; doi:10.3390/diagnostics14010099)
Supplement: Supplementary file 1 [file diagnostics-14-00099-s001.zip › QUADAS2 questions Table S3 final.xlsx]

## Sheet: Feuil1
Tailored QUADAS-2 signaling question (Risk of bias)	Zhang et al. (2018)	Schmauch et al (2019)	Echle et al (2020)	Yamashita et al.(2021)	Lee et al. (2021)	Kather et al. (2020	Krause et al. (2021)	Cao et al. (2020)	Echle et al. (2022)	Wu Jiang et al.(2022)	Bilal et al.(2021)		Jang HJ et al.(2020)	Schrammen et al.(2021)		Saillard et al. (2022)	Chang et al. (2023)	Schirris et al. ( 2022)	Lou et al, (2022)
	MSI	MSI	MSI	MSI	MSI	MSI	MSI	MSI	MSI	MSI	MSI	KRAS/BRAF	KRAS	MSI	KRAS/BRAF	MSI	MSI	MSI	MSI
Domain 1- Patient selection
Did the study avoid inappropriate exclusions?
Are cohorts have more that one data set included?
Was a consecutive or random sample of patients enrolled?
Domain 2- Index test
Was k-fold cross validation used during training to reduce the effects of randomness in dataset splits?
Is there an independent test set used for "external validation"?
Domain 3-Reference standard
Is the reference standard likely to correctly classify the target condition?															NA
Domain 4- Flow and timing
Was there an appropriate interval between index test and reference standard?	NA	NA	NA	NA	NA	NA	NA	NA	NA	NA	NA	NA	NA	NA	NA	NA	NA	NA	NA
Did all patients receive the same reference standard?															NA
Were all patients included in the analysis?
YES
NO
Not applicable	NA
